# Supplementary material
Source: publisher figshare collection journal article supplement (https://gsajournals.figshare.com/ndownloader/files/14890883)
Supplement: Supplementary file 1 [file 14890883]

## Sheet: Offspring UP genes
Gene	Fold Change (LPD/CD)	FDR
Mest	2.49868	2.99529e-07
Cpn2	2.16634	7.66605e-07
Pole	2.10515	9.16129e-06
Slfn10-ps	2.28711	0.000596081
Gm14085	2.32874	0.000922091
Sncg	1.97799	0.00103533
Met	1.54221	0.00141458
Cmbl	1.5437	0.00155372
Slc16a7	1.58601	0.00196423
Hmgb2	1.71306	0.00505601
Themis	1.62166	0.00550479
Osbp2	2.23032	0.00595377
Acsm3	1.80567	0.00641982
Popdc2	1.8146	0.00672427
Nrg4	1.45158	0.00806383
Anxa8	2.28095	0.008602
Adhfe1	1.35808	0.00918547
Slc7a11	2.25717	0.0101682
Adcyap1r1	1.79768	0.0116742
6720489N17Rik	3.12782	0.0148668
Cd8b1	1.53451	0.0157116
Dock11	1.40694	0.0163958
Sult1a1	1.42218	0.0163958
Nup210	1.39587	0.01662
Zfp185	1.74715	0.01683
Zbtb25	1.67472	0.0175699
Clec4e	11.36	0.0179204
Nsg2	1.63942	0.017933
Spn	1.48142	0.0183289
Aqp1	1.35605	0.0184297
Pask	2.58974	0.0203624
Cirbp	1.51268	0.0205567
Rnaseh2b	1.67544	0.0205567
Ivns1abp	1.51004	0.022048
Esrrg	1.81081	0.0223558
Rasgrp1	1.50117	0.0234444
Gpx3	1.47432	0.0234831
Igfbp2	3.12727	0.0267544
Mpg	2.18387	0.0267899
Cd163l1	2.50549	0.0267899
Dennd2d	1.44451	0.0282062
5830411N06Rik	1.95455	0.0288846
Il2ra	1.5953	0.0320778
Impdh1	1.42166	0.0338636
Pck1	1.8489	0.0393724
Zfp518a	1.39711	0.0395033
Peli1	1.37787	0.0407268
Zfp280c	1.46235	0.0408121
Acer2	1.38399	0.0413214
Nlrc3	1.46142	0.0451895
Chst11	1.49796	0.0466148
Bub1	2.62092	0.0466603
Med27	1.64145	0.0480209
Gstt1	1.58855	0.0497336

## Sheet: Offspring DOWN genes
Gene	Fold Change (LPD/CD)	FDR
Hephl1	-4.40638	9.29569e-28
Ttc25	-4.06298	2.23909e-24
Tmem79	-2.35063	2.28358e-14
Krt19	-10.403	2.79527e-14
Kcng4	-10.1081	2.79527e-14
Wisp2	-4.20388	5.32689e-13
Atp1a3	-4.33631	9.58633e-13
Cd209f	-2.33931	1.54665e-11
Rap1gap	-2.76649	3.08483e-10
Ntn1	-2.04862	3.08483e-10
Elovl6	-2.57517	1.99946e-09
Nabp1	-2.12286	4.36407e-09
Mfap4	-5.325	7.66274e-09
Adcy10	-3.10793	2.50739e-08
Cdc42bpg	-2.13379	5.29391e-08
2310069B03Rik	-4.0622	1.58128e-07
Stard8	-1.76434	1.66288e-07
Oxtr	-4.26466	5.71224e-07
Serpina3k	-10.5	7.47013e-07
Sorcs2	-1.92276	1.10464e-06
Ptn	-3.00308	1.38066e-06
Slc25a1	-2.04034	1.38066e-06
Lgals3bp	-1.70132	1.56709e-06
Retnla	-3.10918	1.81291e-06
Acsl5	-1.97002	1.81291e-06
Gas6	-1.72229	1.87318e-06
Gpi1	-1.54549	3.05604e-06
Echdc1	-1.71679	3.93283e-06
Anpep	-1.73347	4.17856e-06
Sfrp2	-1.95584	4.27458e-06
Slc2a5	-2.55513	6.11873e-06
Comt	-2.09213	6.33195e-06
Nbl1	-1.77753	7.41055e-06
Clec10a	-1.75526	8.49195e-06
Acacb	-1.50774	8.91577e-06
Fn1	-1.6444	1.44181e-05
Elovl5	-1.51712	1.52199e-05
Scara5	-1.71735	2.03141e-05
Acot11	-2.39758	2.35814e-05
Ncan	-3.0514	2.79825e-05
Mtcl1	-2.6254	4.58263e-05
Pltp	-1.67043	5.49525e-05
Bmp1	-1.67308	5.92022e-05
Plac9b	-1.95095	5.96973e-05
Pfkl	-1.61723	5.96973e-05
Mapk8ip1	-2.62719	6.61482e-05
Atg9b	-2.95575	7.15706e-05
Gata6	-1.91881	9.53995e-05
Arsi	-2.18013	0.000104511
Paqr9	-1.44911	0.000130054
Hebp2	-2.42019	0.000137298
Rassf3	-2.03872	0.000137298
Pkm	-1.47652	0.000156463
Prune2	-2.7931	0.000156857
Eno1	-1.33502	0.000200222
Tuba8	-1.86554	0.000254441
Creb5	-1.63287	0.000259983
Nkd1	-2.13588	0.0002624
Csf1r	-1.46181	0.000265371
Adamts4	-3.4908	0.000325892
Itgbl1	-1.97601	0.000334206
Plxnb2	-1.48874	0.000378456
Mvd	-2.13327	0.000380845
Sh3pxd2b	-1.96326	0.000380845
Cd248	-1.72976	0.000380845
Fcgr1	-2.51461	0.000391692
Gfra2	-1.86794	0.000391692
Acta2	-1.64958	0.000445987
Adgra2	-1.70081	0.000462597
Fcrls	-1.9087	0.000495508
Col1a2	-1.59746	0.000540464
Adgre1	-1.54797	0.000562112
Col1a1	-1.67676	0.000866392
Siglec1	-1.46214	0.000874021
Fbn2	-3.70928	0.00097397
Slc15a5	-4.48437	0.000978949
Cnn1	-4.06024	0.000978949
Eln	-1.92297	0.00103533
Tmem100	-2.12724	0.00105596
Npr1	-1.49239	0.00106
Cd163	-1.64052	0.00117672
Spire1	-1.66352	0.00118014
Slc8a1	-1.91125	0.00136374
Vgll3	-1.82205	0.00140122
Tbxas1	-2.12825	0.00141458
Fbln1	-1.66458	0.00144969
Osgin1	-2.11891	0.0014699
Cd209b	-1.56941	0.00152398
Ppp2r5b	-1.95918	0.00154249
Lrpap1	-1.53123	0.00155372
Cish	-1.80557	0.00170736
Reep6	-1.69523	0.00170736
Slc38a10	-1.48866	0.0017623
Fam57b	-2.3969	0.00176864
Ptafr	-1.73033	0.00183835
Mpc2	-1.50426	0.00189969
C1qa	-1.66061	0.00212684
Insig1	-1.35464	0.00226968
Ston2	-1.69037	0.00233123
C6	-2.4023	0.00303167
Tnxb	-1.34607	0.00303167
Alcam	-1.57883	0.00374881
Scn1b	-1.7125	0.00384785
Fbn1	-1.54035	0.00384785
Mafb	-1.53919	0.00384785
Deptor	-1.40654	0.00384785
Col7a1	-2.33557	0.00438519
Pdgfrl	-2.17391	0.00545886
Ston1	-1.53477	0.00545886
Mmp14	-1.60036	0.00563918
1700037H04Rik	-1.40243	0.00563918
Rmdn3	-1.45364	0.00568211
Dnm1	-1.52847	0.00576283
Me1	-1.8615	0.0057696
Gfpt2	-1.65285	0.0057696
Csf2ra	-1.60013	0.0057696
Mcc	-1.48161	0.0057696
Sqle	-1.71645	0.0058494
Spns1	-1.6759	0.00620176
Antxr1	-1.4571	0.00640697
Cfh	-1.49955	0.00641982
Rgl1	-1.38797	0.00641982
Praf2	-2.34426	0.00660225
Hspb8	-1.58007	0.00660225
C1qc	-1.62908	0.00692297
Man1c1	-1.48139	0.00692297
Fbln2	-1.42757	0.00722854
C1qb	-1.63002	0.00765461
Aldh1a3	-1.59872	0.00780676
Rab3il1	-1.52739	0.00824012
Cd300ld3	-2.22222	0.00859279
Krt222	-2.86598	0.00918547
C1qtnf6	-1.70504	0.00918547
Pdgfb	-1.45143	0.00918547
Abhd5	-1.41094	0.00931836
Lyz1	-1.84041	0.00956962
Aldoa	-1.34075	0.00956962
Lyz2	-1.40279	0.00964689
Ctsd	-1.4053	0.00973098
Hist1h2bc	-1.4839	0.00974471
Maff	-2.54147	0.00998429
Rims4	-1.71135	0.0103861
Spon2	-2.11658	0.0103987
Mob3c	-1.52833	0.0103987
Grn	-1.32889	0.0103987
Fam78b	-1.75265	0.0104209
Prkg2	-1.79041	0.0104611
B4galt6	-1.6173	0.0111975
Arhgef10l	-1.54218	0.0112334
Trf	-1.18303	0.0112417
Pcolce	-1.52541	0.0113612
Mpc1	-1.50844	0.0114855
Dapk1	-1.49099	0.0114855
Axl	-1.46728	0.0115218
Selenop	-1.22312	0.0120526
Dtx4	-2.44912	0.0122046
Aebp1	-1.43492	0.0124783
Kit	-1.45187	0.0128052
Dhrs7	-1.46912	0.0128158
Lss	-1.84202	0.0128283
Egfr	-1.5174	0.0134538
Serpinf1	-1.48419	0.0137709
Cpz	-1.88765	0.0145367
Cyr61	-1.64751	0.0147201
Pgd	-1.5742	0.0148668
Fabp5	-1.887	0.014913
Flt4	-1.79745	0.0149796
Itga11	-1.61269	0.0150443
C1qtnf12	-1.43117	0.0157116
Gata2	-1.7466	0.0159955
Plin2	-1.36971	0.0159955
Irx5	-2.90435	0.0163958
Orm1	-1.59984	0.0168993
Slc38a4	-1.85088	0.016954
Tecr	-1.4527	0.016954
Fcgr3	-1.63636	0.0170655
Scd2	-1.81325	0.0172368
Cyb5b	-1.56712	0.0172368
Tmeff2	-1.55831	0.0172368
Mmrn2	-1.41882	0.0172368
Nfil3	-1.59091	0.0173692
Sntg2	-3.77778	0.0175182
Ntn4	-1.61438	0.0175673
Timp2	-1.42012	0.0175673
Adgrd1	-1.56215	0.0176393
Cmtm3	-1.49444	0.017875
Lipg	-2.01296	0.0182447
Trpv4	-1.70861	0.0183289
Taldo1	-1.30193	0.0183289
Cyp51	-1.83576	0.0188931
Mrc1	-1.42252	0.0188931
Lvrn	-1.96854	0.0190422
6430571L13Rik	-1.77765	0.0192692
Sema3c	-1.55254	0.0192692
Rtl1	-1.98182	0.0192854
F13a1	-1.4883	0.0192854
Qsox1	-1.38081	0.0192854
Iigp1	-1.49389	0.0194578
1810024B03Rik	-3.07	0.0202992
Ugt8a	-2.09766	0.0205567
Oas1a	-2.10946	0.0208639
Ssc5d	-1.53277	0.0220217
Fzd2	-2.06789	0.022048
Igfbp5	-1.39507	0.022048
Reps2	-1.50433	0.0222803
Basp1	-1.48104	0.0225341
Fstl1	-1.3566	0.0230894
Aldh1l2	-2.05326	0.0242937
Mycl	-1.76553	0.0247386
Efnb1	-1.48341	0.0247386
B3galt1	-2.95517	0.0249545
Clec11a	-2.03581	0.0255108
Ptgfrn	-1.43011	0.0267544
Robo4	-1.39714	0.0267544
Il22ra2	-1.88453	0.0267899
Aacs	-1.52803	0.0267899
Ehd4	-1.39134	0.0267899
Arhgef10	-1.43402	0.0269256
Cfp	-1.52478	0.0278181
Npas2	-4.51748	0.0282062
Stab1	-1.34093	0.0282062
P2ry2	-1.87255	0.02869
Ngfr	-2.26209	0.0288846
Mlxipl	-1.48048	0.0288846
Adprhl1	-4.30645	0.0288892
Pkp2	-1.47943	0.0289678
Ace	-1.46386	0.0289923
Rtn2	-1.6875	0.0300763
Fam210b	-1.41785	0.0304596
Spred3	-2.03676	0.0304788
Tkt	-1.42992	0.0307905
Spaca1	-2.34896	0.0308755
Irx2	-2.34397	0.0339514
En1	-2.11245	0.0343576
Crispld1	-1.82096	0.0347654
Glis2	-1.61751	0.0350942
Marc1	-2.10717	0.0354218
Ptms	-1.34463	0.0357491
Gm4951	-1.84566	0.0365269
Radil	-1.59161	0.0372551
Dhrs3	-1.57733	0.0374929
Apoc3	-3.39157	0.0381165
Cela1	-1.87684	0.0381165
Gas2l1	-1.39287	0.0381736
Acly	-1.60619	0.0392825
F830016B08Rik	-1.87807	0.0395033
Alox5	-1.79762	0.0400281
Clec12a	-1.77871	0.0408121
Dpysl3	-1.43911	0.0408121
Cd68	-1.42028	0.0408121
Col5a2	-1.34051	0.0408121
Tspan11	-2.31707	0.0408528
Rab11fip5	-1.37265	0.0409723
Kmt5a	-1.37369	0.041461
Alox15	-3.91667	0.0421213
Frmd6	-1.38122	0.0424583
Olfml2b	-1.60759	0.0428335
Stab2	-1.53726	0.0433699
Parp12	-1.37247	0.0437408
Prss23	-1.48458	0.0437668
Fat4	-1.65073	0.0451895
Impa2	-1.87759	0.0456131
Col5a1	-1.38152	0.0456131
Lgi3	-2.66949	0.0464739
Anxa3	-1.35107	0.0467348
Loxl2	-1.40944	0.0468376
Tmem56	-2.2508	0.0474443
Mrc2	-1.39646	0.0474466
Slc11a1	-1.69217	0.0484599
Col3a1	-1.47024	0.0491643
Lsm11	-1.57435	0.0492583
Ifitm3	-1.43001	0.0492583
Tmem184b	-1.36737	0.0496012
Tnfaip6	-2.33784	0.0499509
